# Supplementary material
Source: Springer Nature journal article supplement (https://www.springermedizin.de/resource/supplementary/12894_2006_93_MOESM7_ESM.pdf/9513944)

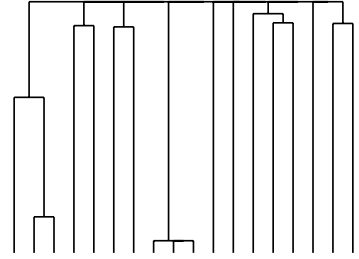

CRE-Bp1/V\$CREBP1\_Q2  
 CRE-BP1/c-Jun/V\$CREBP1CJUN\_01  
 CREB/V\$CREB\_01  
 NF-kappaB/V\$NFKB\_Q6  
 AP-1/V\$AP1\_Q2  
 Pax-6/V\$PAX6\_01  
 v-Myb/V\$VMYB\_01  
 NGFI-C/V\$NGFIC\_01  
 Egr-3/V\$EGR3\_01  
 Egr-1/V\$EGR1\_01  
 NRSF/V\$NRSF\_01  
 HEN1/V\$HEN1\_01  
 AREB6/V\$AREB6\_Q3  
 Hand1/E47/V\$HAND1E47\_01  
 c-Rel/V\$CREL\_01  
 AP-1/V\$AP1\_C  
 USF/V\$USF\_Q6  
 TCF11/MafG/V\$TCF11MAFG\_01

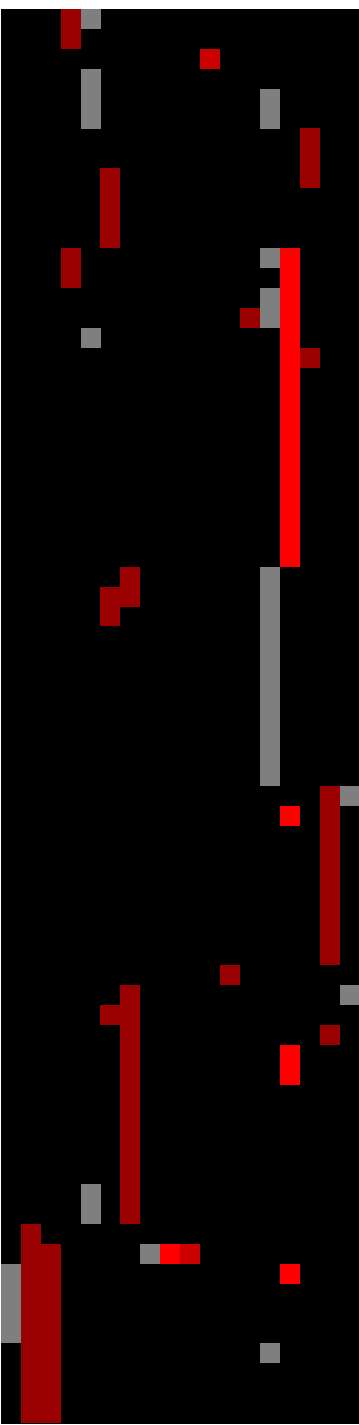

J04758 (Tph1)  
 AF003747 (Slc30a4)  
 D10028 (Grin1)  
 X74936 (Foxa1)  
 AJ001549 (Fmr2)  
 Z23069 (Gal)  
 X59421 (Fli1)  
 X53584 (Hspd1)  
 Y00671 (Met)  
 AF033003 (Kcnab1)  
 U18869 (Dab2)  
 X60671 (Vil2)  
 D26157 (Ptgir)  
 U21050 (Traf3)  
 D13759 (Map3k8)  
 X80417 (Kcnj12)  
 M87039 (Nos2)  
 D31788 (Bst1)  
 U70068 (Kcnq1)  
 M59378 (Tnfrsf1b)  
 X57796 (Tnfrsf1a)  
 M92378 (Slc6a1)  
 U36203 (Skil)  
 U09419 (Nr1h2)  
 U73521 (Slc1a1)  
 X04648 (Fcgr2b)  
 M27129 (Cd44)  
 M83749 (Ccnd2)  
 U31625 (Brca1)  
 D17577 (Kif1b)  
 U66203 (Fgf11)  
 L36179 (Scn7a)  
 U57329 (Tbx4)  
 U25685 (Syk)  
 M16472 (Plp1)  
 M63801 (Gja1)  
 M81342 (Fgfr3)  
 L35049 (Bcl211)  
 Z22649 (Mpl)  
 U39643 (Faf1)  
 L07049 (Agc1)  
 U21050 (Traf3)  
 AF058055 (Slc16a1)  
 M13226 (Gzma)  
 D10171 (Grid1)  
 M63660 (Gna13)  
 M12414 (Apoe)  
 U75506 (Bid)  
 U05672 (Adora2a)  
 U92456 (Srpk2)  
 D76446 (Map3k7)  
 M20658 (Il1r1)  
 Z37110 (Ccng1)  
 X67812 (Ret)  
 X61753 (Hsf1)  
 X61434 (Prkacb)  
 X53584 (Hspd1)  
 L40406 (Hsp105)  
 X63100 (Gja7)  
 AF014941 (Ctsw)  
 M13685 (Prnp)  
 L27105 (Nf2)  
 L07297 (Flt1)  
 M31042 (Ier2)  
 X78339 (Epha2)  
 U57311 (Ywhah)  
 U29086 (Neurod6)  
 M28233 (Ifngr1)  
 M58589 (Pcsk1)  
 U37720 (Cdc42)  
 X83106 (Mad)

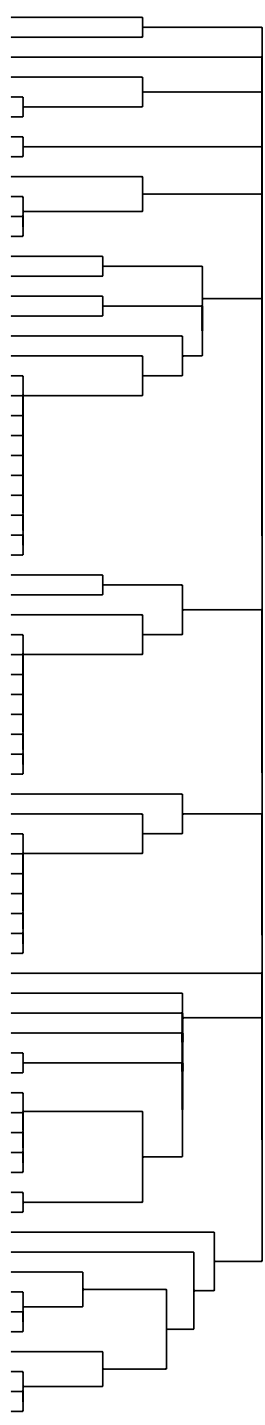

Supplement: MOESM7 [file 9513944]
